# Supplementary material for: Association between obstructive mouth breathing and oral microbiota in children: a cross-sectional study
Source: Research Square preprint supplement (doi:10.21203/rs.3.rs-8525951/v1), 2026-01-30
Supplement: Supplementary file 1 [file 2f28402cf96b2e61bac7d103.docx]

**Appendix Figure. 1 Random Forest Analysis for the identification of diagnostic microbial biomarkers.**


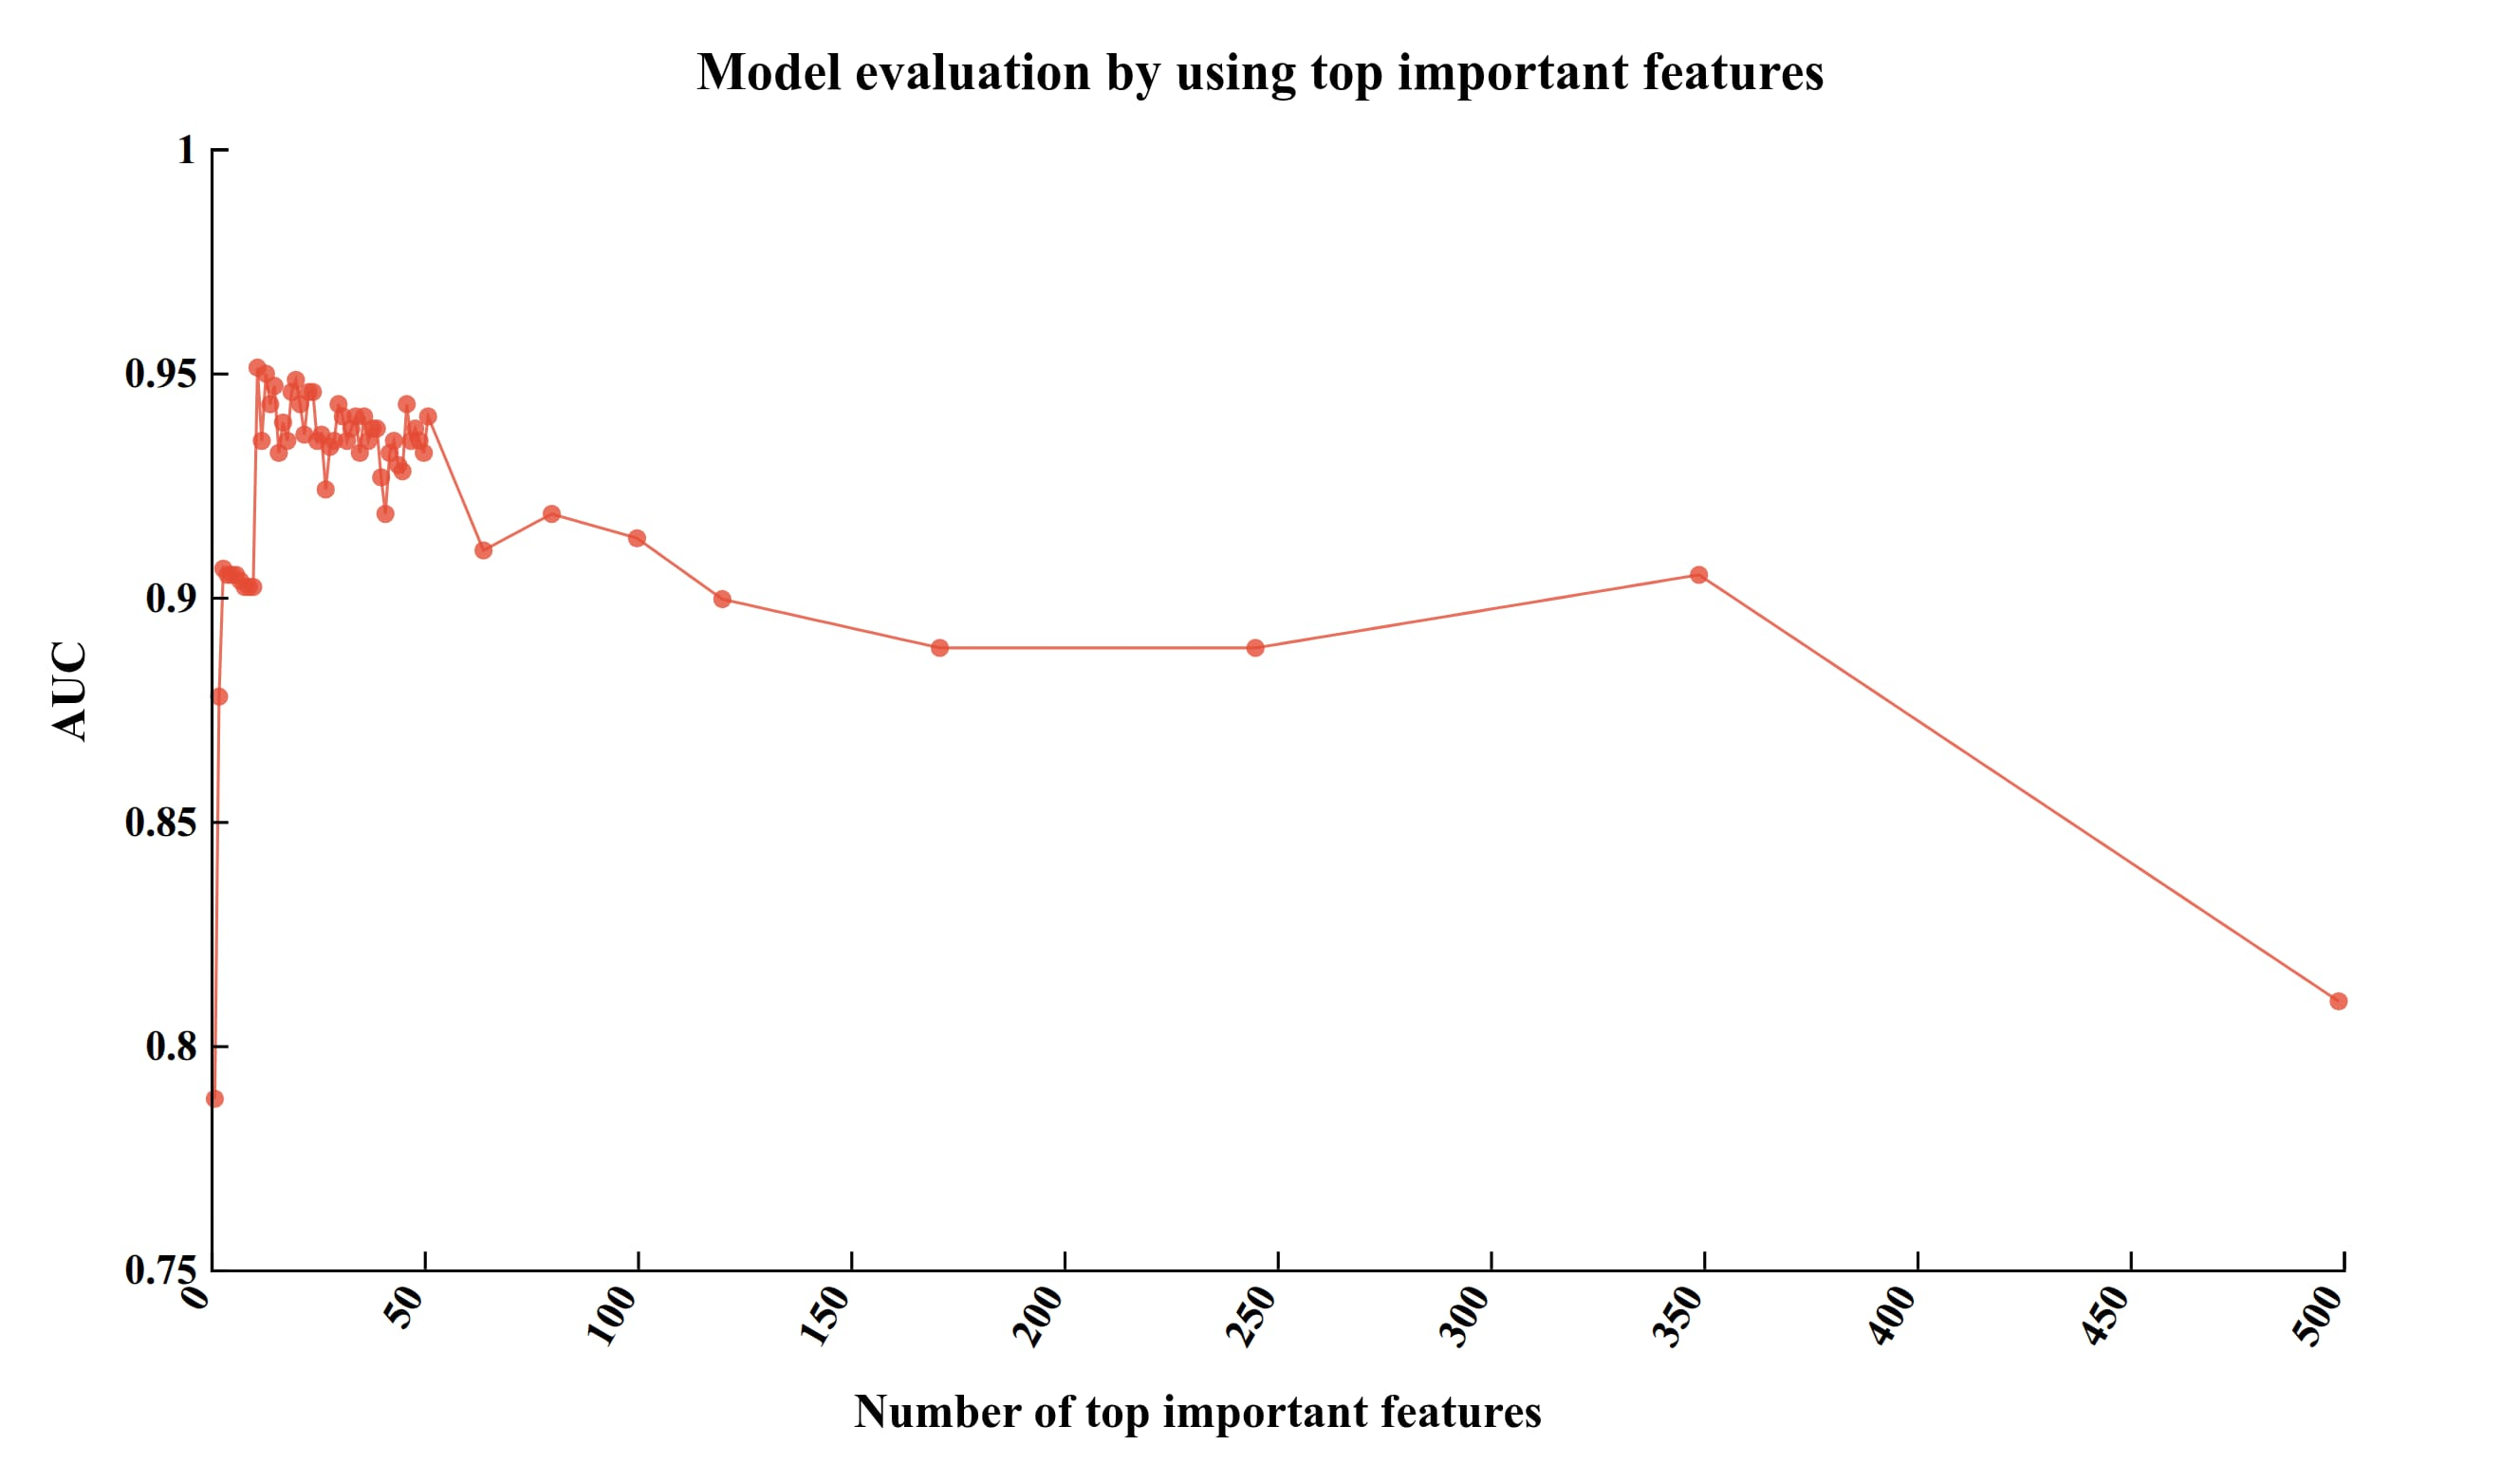


**(A)**


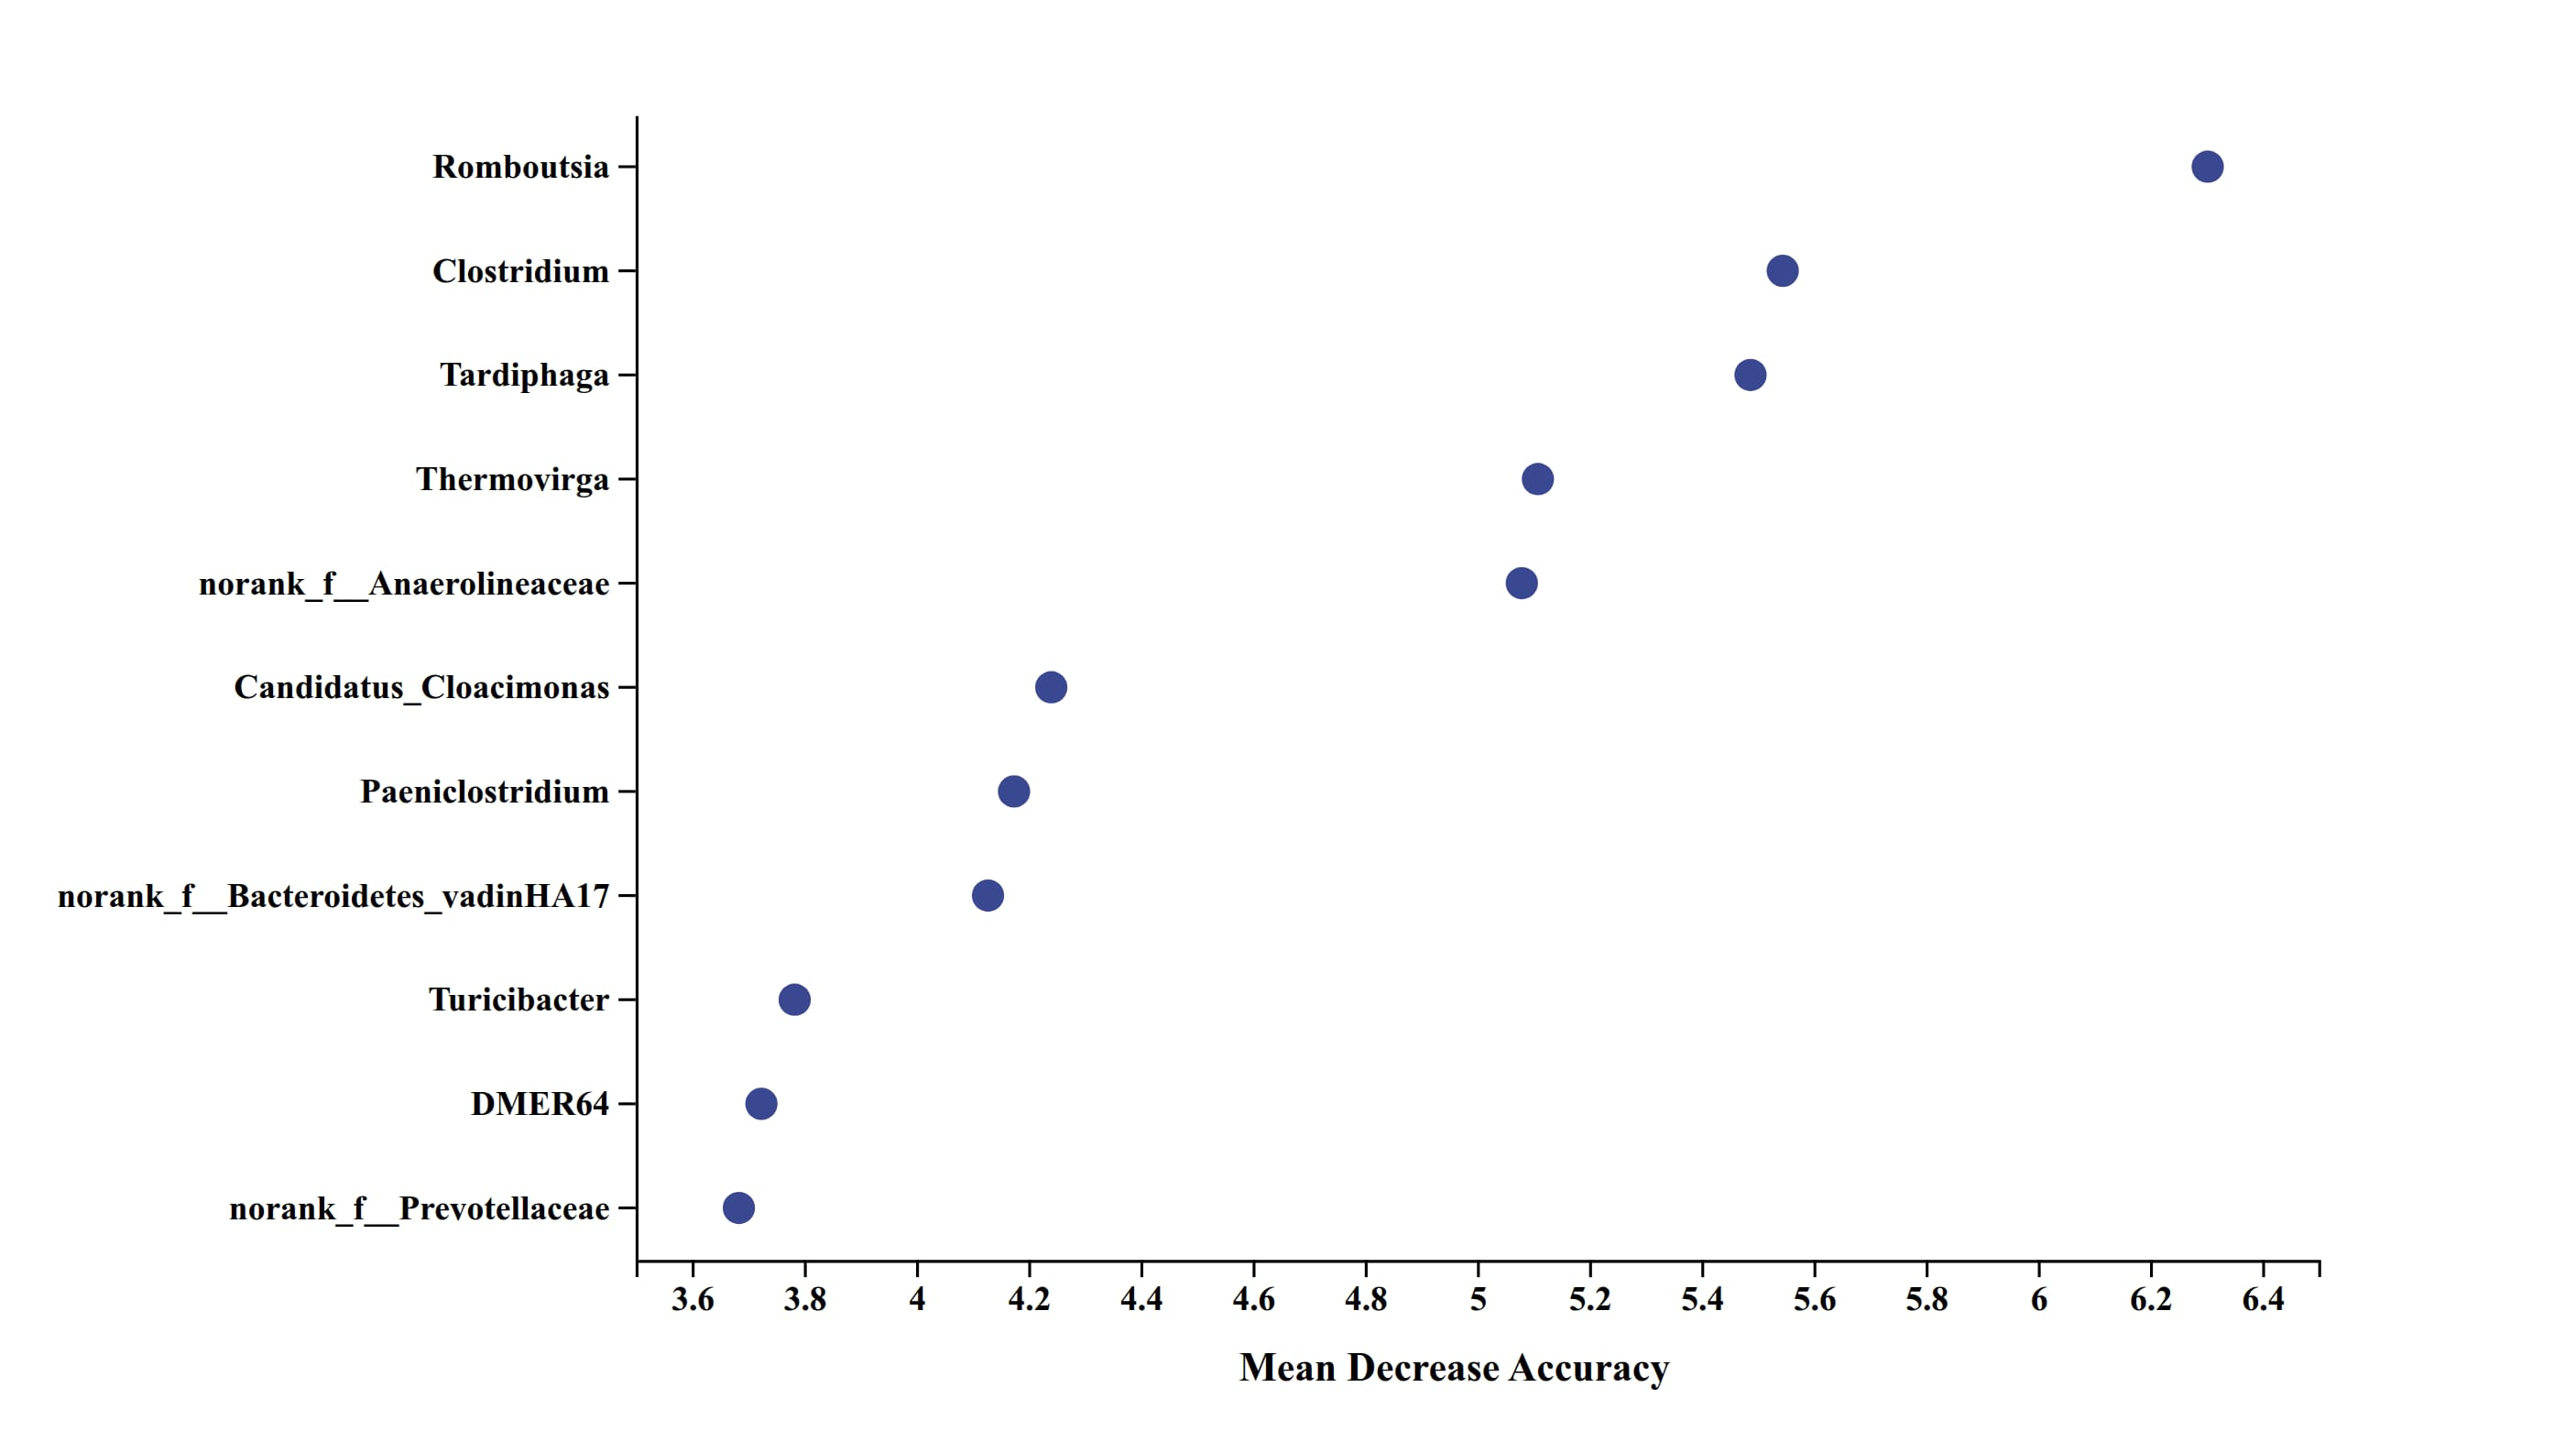


**(B)**

**(A)** Model evaluation using cross-validation. The curve illustrates the relationship between the number of top important features (x-axis) and the model accuracy (AUC, y-axis), identifying the optimal number of features for classification. **(B)** The top discriminant bacterial taxa ranked by Mean Decrease Accuracy. Taxa with higher values on the x-axis are more important for distinguishing between the OMB and NB groups.
AUC, area under the curve; OMB, obstructive mouth breathing; NB, nasal breathing.
